# Supplementary material for: Instability in Evolutionary Games
Source: PLOS journal article supplement (doi:10.1371/journal.pone.0049663), 2012-11-29
Supplement: S1 (10.1371/journal.pone.0049663.s001) [file journal.pone.0049663.s001]

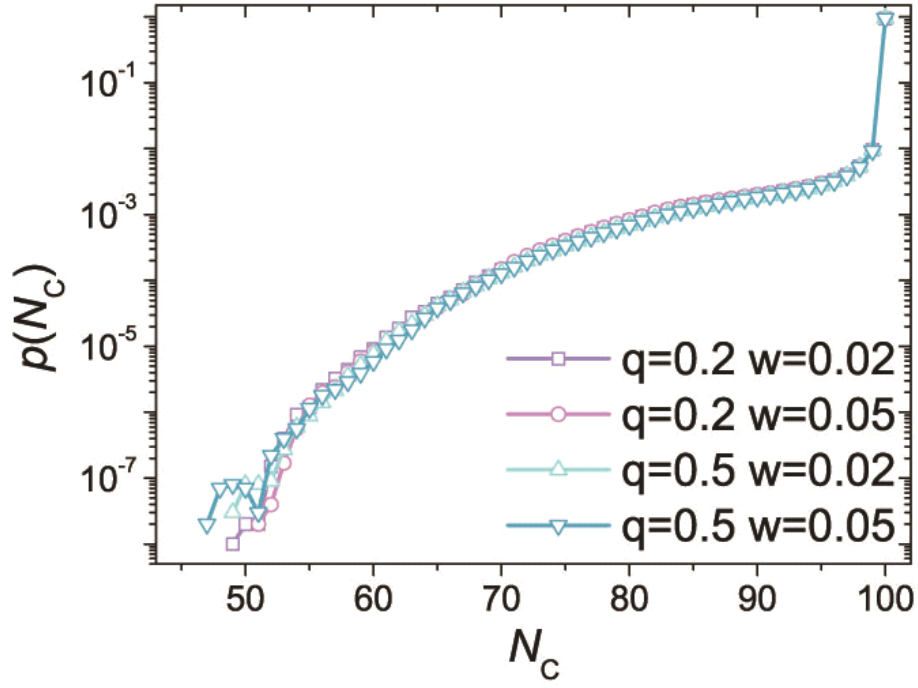

**Figure S1. The distributions  $p(N_C)$  for different parameters  $(q, w)$  with the good-get-richer mechanism.** Each distribution is obtained by  $10^8$  time steps with other parameters fixed as  $N=100$ ,  $\alpha=0.0001$  and  $r=0.1$ . The selection strategy tends to select more successful player as the role-model, and when  $q > w$ , there is a good-get-richer effect.
