# Supplementary material for: Instability in Evolutionary Games
Source: PLOS journal article supplement (doi:10.1371/journal.pone.0049663), 2012-11-29
Supplement: S2 (10.1371/journal.pone.0049663.s002) [file journal.pone.0049663.s002]

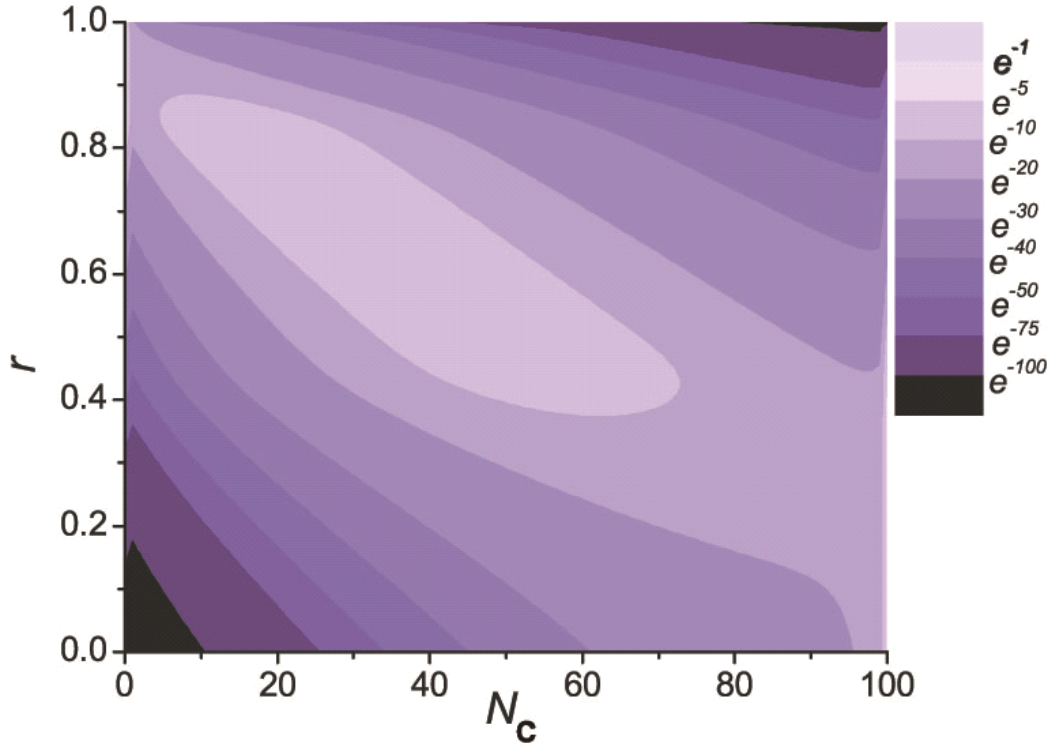

**Figure S2. Effects of  $r$  on the distribution of the number of cooperators  $p(N_c)$ .**

This plot shows the analytical solutions from Eqs. (14) and (15) for  $N=100$  and  $\alpha=0.0001$ , with the value of  $p(N_c)$  indicated by the color. The distribution is

normalized as  $\sum_{N_c=0}^N p(N_c, r) = 1$  for each value of  $r$ .
