# Supplementary material for: Instability in Evolutionary Games
Source: PLOS journal article supplement (doi:10.1371/journal.pone.0049663), 2012-11-29
Supplement: S4 (10.1371/journal.pone.0049663.s004) [file journal.pone.0049663.s004]

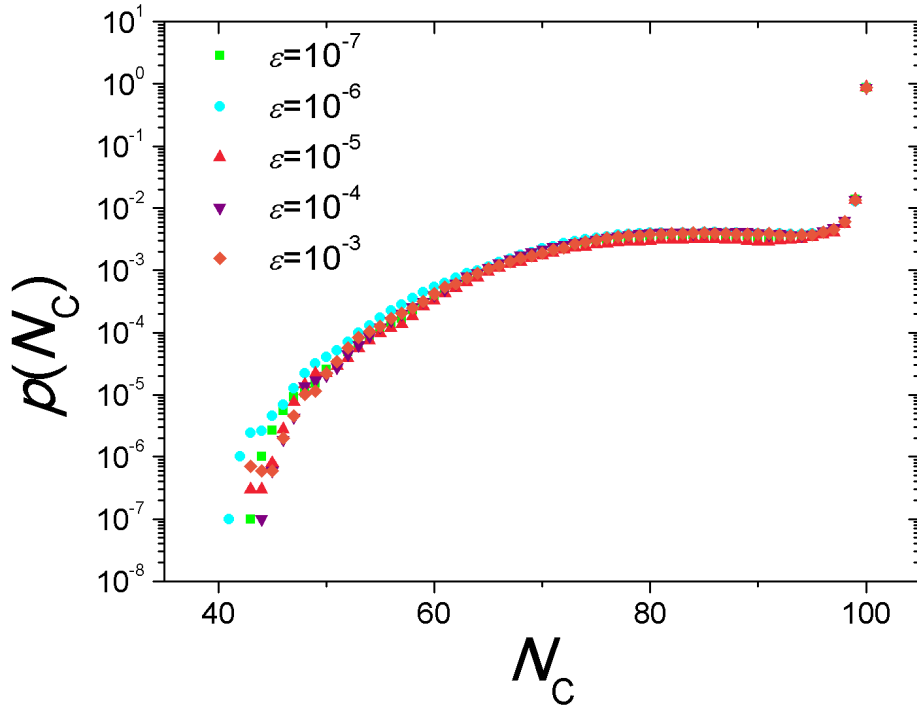

**Figure S4. The distributions  $p(N_C)$  for different  $\varepsilon$ .** Each distribution is obtained by  $10^7$  time steps with other parameters fixed as  $N=100$ ,  $m=3$ ,  $\alpha=0.0001$  and  $r=0.2$ . Obviously, the parameter  $\varepsilon$  has almost no impact on the distributions  $p(N_C)$ .
